# Supplementary material
Source: publisher figshare collection journal article supplement (https://acs.figshare.com/ndownloader/files/25159835)
Supplement: Supplementary file 1 [file 25159835]

## **Supporting Information**

**for**

### **Single Open Sites on Fe<sup>II</sup> Ions Stabilized by Coupled Metal Ions in CN-Deficient Prussian Blue Analogues for High Catalytic Activity in the Hydrolysis of Organophosphates**

Mari Yamane,<sup>†</sup> Hiroyasu Tabe,<sup>†,‡</sup> Masami Kawakami,<sup>§</sup> Hisashi Tanaka,<sup>§</sup> Tohru Kawamoto<sup>§</sup> and  
Yusuke Yamada<sup>\*,†,‡</sup>

<sup>†</sup>Department of Applied Chemistry and Bioengineering, Graduate School of Engineering, Osaka City  
University, 3-3-138 Sugimoto, Sumiyoshi, Osaka 558-8585, Japan

<sup>‡</sup>Research Center of Artificial Photosynthesis (ReCAP), Osaka City University, 3-3-138 Sugimoto,  
Sumiyoshi, Osaka 558-8585, Japan

<sup>§</sup>Nanomaterials Research Institute, National Institute of Advanced Industrial Science and Technology  
(AIST), 1-1-1 Higashi, Tsukuba 305-8565, Japan

\*E-mail: ymd@a-chem.eng.osaka-cu.ac.jp.

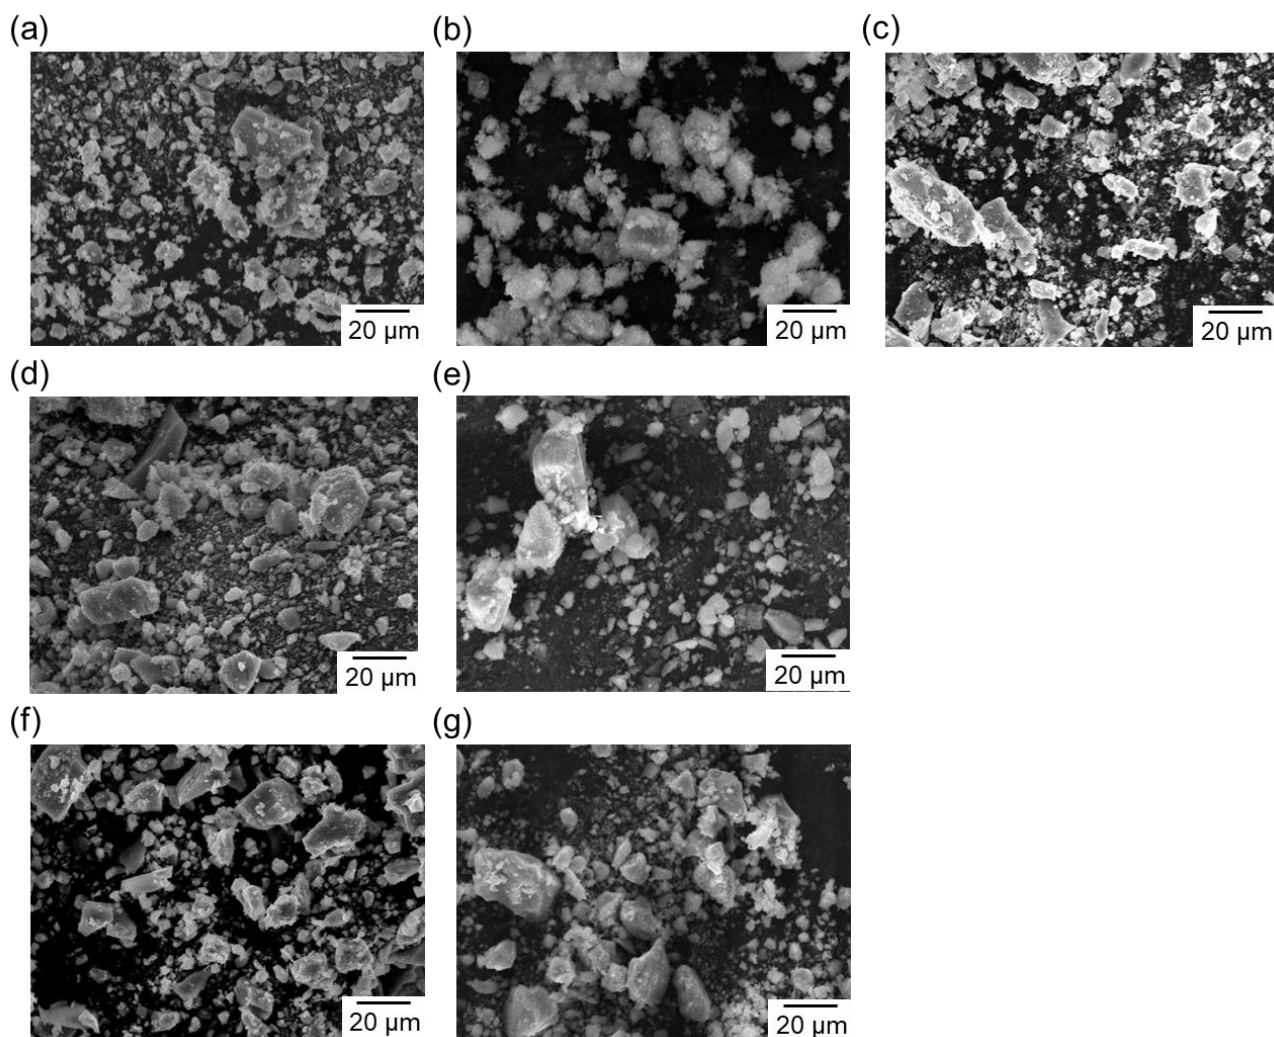

**Figure S1.** Scanning electron microscope (SEM) images of (a)  $[\text{Cu}^{\text{II}}(\text{H}_2\text{O})_{8/3}]_{3/2}[\text{Fe}^{\text{II}}(\text{CN})_5(\text{NH}_3)]$  (**CuFe-NH<sub>3</sub>**), (b)  $[\text{Cu}^{\text{II}}(\text{H}_2\text{O})_2]_{3/2}[\text{Fe}^{\text{II}}(\text{CN})_6]$  (**CuFe**), (c)  $[\text{Cu}^{\text{II}}(\text{H}_2\text{O})_{8/3}]_{3/2}\{[\text{Fe}^{\text{II}}(\text{CN})_5(\text{H}_2\text{O})]_{3/4}[\text{Fe}^{\text{II}}(\text{CN})_5(\text{NH}_3)]_{1/4}\}$  (**CuFe-H<sub>2</sub>O**), (d)  $[\text{Co}^{\text{II}}(\text{H}_2\text{O})_{8/3}]_{3/2}[\text{Fe}^{\text{II}}(\text{CN})_5(\text{NH}_3)]$  (**CoFe-NH<sub>3</sub>**), (e)  $[\text{Co}^{\text{II}}(\text{H}_2\text{O})_2]_{3/2}[\text{Fe}^{\text{II}}(\text{CN})_6]$  (**CoFe**), (f)  $[\text{Ga}^{\text{III}}(\text{H}_2\text{O})][\text{Fe}^{\text{II}}(\text{CN})_5(\text{NH}_3)]$  (**GaFe-NH<sub>3</sub>**) and (g)  $[\text{Ga}^{\text{III}}(\text{H}_2\text{O})_{3/2}]_{4/3}[\text{Fe}^{\text{II}}(\text{CN})_6]$  (**GaFe**).

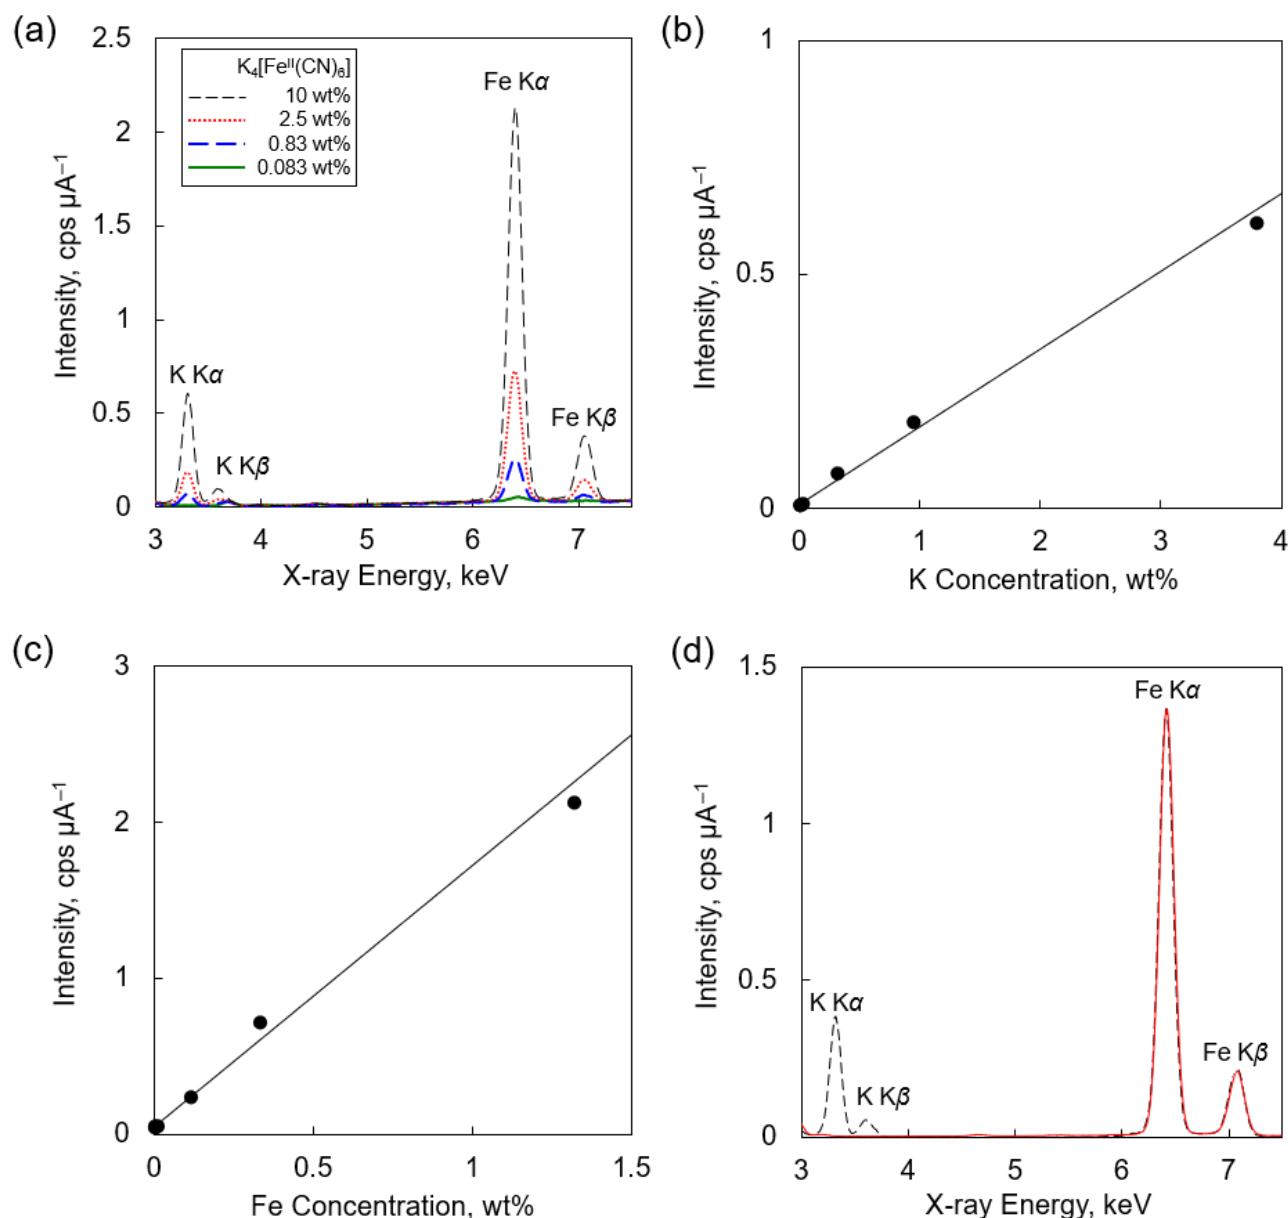

**Figure S2.** (a) X-ray fluorescence spectra of potassium hexacyanoferrate(II) trihydrate ( $K_4[Fe^{II}(CN)_6] \cdot 3H_2O$ , 0.083–10 wt%) diluted with silica. (b, c) Peak intensity of (b) K K $\alpha$  (3.3 keV) or (c) Fe K $\alpha$  (6.4 keV) as a function of concentrations of K or Fe obtained from (a). (d) X-ray fluorescence spectra of  $[Cu^{II}(H_2O)_3]_2[Fe^{II}(CN)_6]$  (**CuFe**, solid line) and  $K_4[Fe^{II}(CN)_6] \cdot 3H_2O$  (broken line). No obvious peak of K K $\alpha$  was observed for **CuFe**.

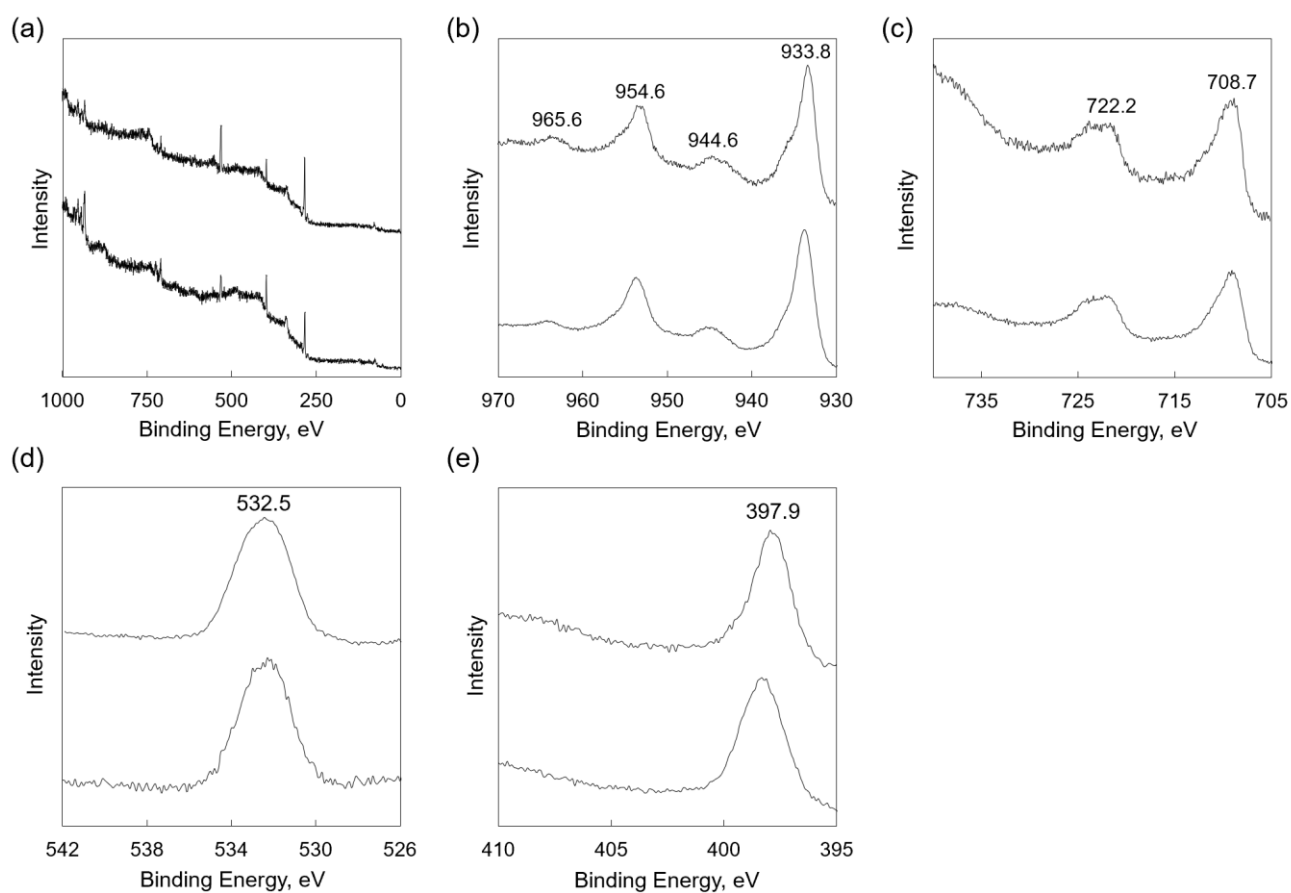

**Figure S3.** (a) Overall X-Ray photoelectron (XPS) spectra and magnified views in the binding energy regions of (b) Cu 2p, (c) Fe 2p (d) O 1s and (e) N 1s for **CuFe-NH<sub>3</sub>** (upper lines) and **CuFe** (lower lines).

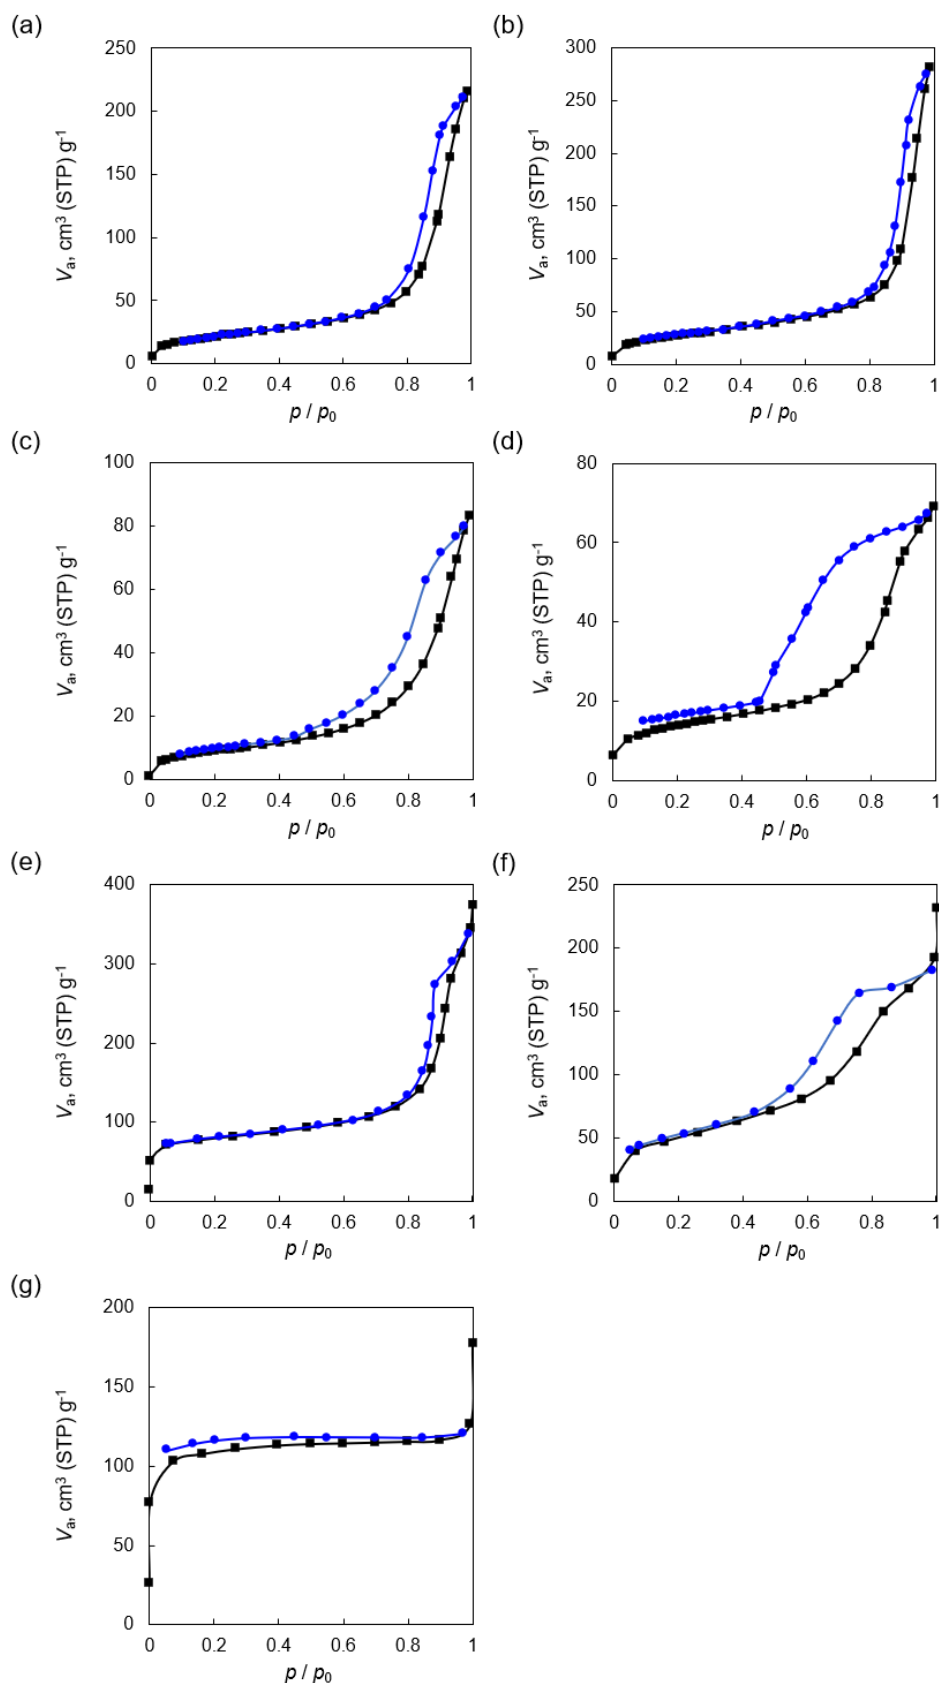

**Figure S4.** Nitrogen adsorption (■)–desorption (●) isotherms of (a)  $[\text{Cu}^{\text{II}}(\text{H}_2\text{O})_{8/3}]_{3/2}[\text{Fe}^{\text{II}}(\text{CN})_5(\text{NH}_3)]$  (**CuFe-NH<sub>3</sub>**), (b)  $[\text{Cu}^{\text{II}}(\text{H}_2\text{O})_2]_{3/2}[\text{Fe}^{\text{II}}(\text{CN})_6]$  (**CuFe**), (c)  $[\text{Cu}^{\text{II}}(\text{H}_2\text{O})_{8/3}]_{3/2}[\text{Fe}^{\text{II}}(\text{CN})_5(\text{H}_2\text{O})]$  (**CuFe-H<sub>2</sub>O**), (d)  $[\text{Co}^{\text{II}}(\text{H}_2\text{O})_{8/3}]_{3/2}[\text{Fe}^{\text{II}}(\text{CN})_5(\text{NH}_3)]$  (**CoFe-NH<sub>3</sub>**), (e)  $[\text{Co}^{\text{II}}(\text{H}_2\text{O})_2]_{3/2}[\text{Fe}^{\text{II}}(\text{CN})_6]$  (**CoFe**), (f)  $[\text{Ga}^{\text{III}}(\text{H}_2\text{O})][\text{Fe}^{\text{II}}(\text{CN})_5(\text{NH}_3)]$  (**GaFe-NH<sub>3</sub>**) and (g)  $[\text{Ga}^{\text{III}}(\text{H}_2\text{O})_{3/2}]_{4/3}[\text{Fe}^{\text{II}}(\text{CN})_6]$  (**GaFe**).

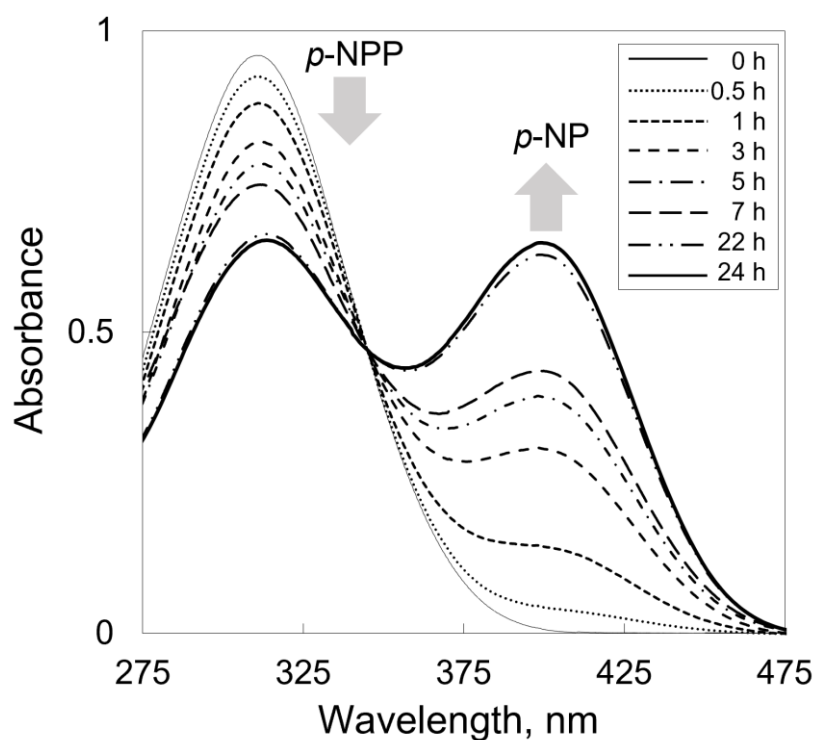

**Figure S5.** UV-Vis spectral change by hydrolysis of disodium *p*-nitrophenyl phosphate (*p*-NPP, 25 mM) in a HEPES buffer solution (100 mM, 0.75 mL, pH 6.0) containing  $[\text{Cu}^{\text{II}}(\text{H}_2\text{O})_{8/3}]_{3/2}[\text{Fe}^{\text{II}}(\text{CN})_5(\text{NH}_3)]$  (**CuFe-NH<sub>3</sub>**, 0.063 mmol of Fe) at 50 °C. An aliquot (10  $\mu\text{L}$ ) of the reaction mixture was periodically sampled and diluted with HEPES buffer solution (100 mM, 2490  $\mu\text{L}$ , pH 8.3). The peaks at 315 and 400 nm are assignable to *p*-NPP and *p*-nitrophenolate ion (*p*-NP), respectively.

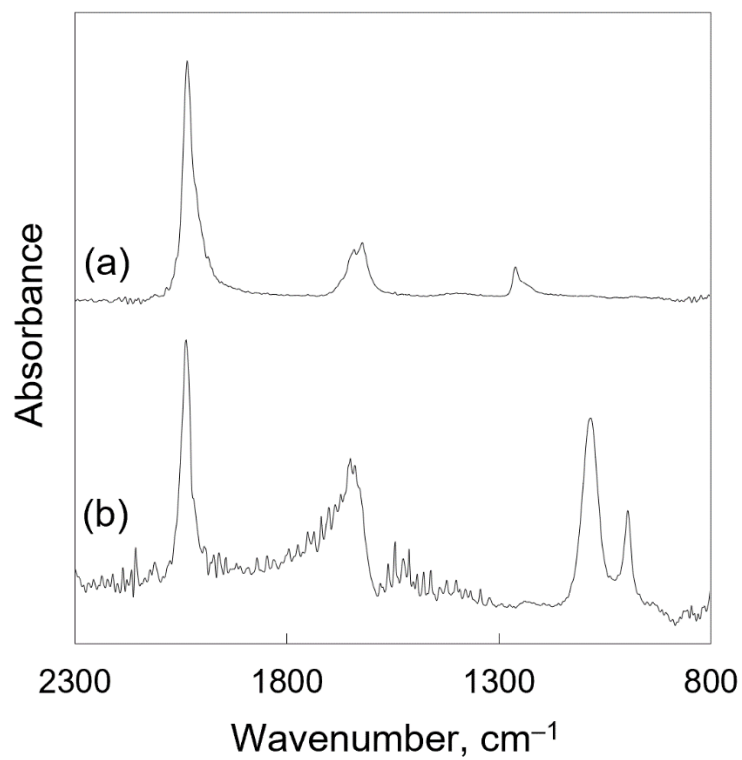

**Figure S6.** Infrared (IR) spectra of aqueous solutions containing (a) pentacyanoammineferrate ion ( $[\text{Fe}^{\text{II}}(\text{CN})_5(\text{NH}_3)]^{3-}$ , 100 mM) and (b)  $[\text{Fe}^{\text{II}}(\text{CN})_5(\text{NH}_3)]^{3-}$  (100 mM) and hydrogen phosphate ( $\text{HPO}_4^-$ , 100 mM).

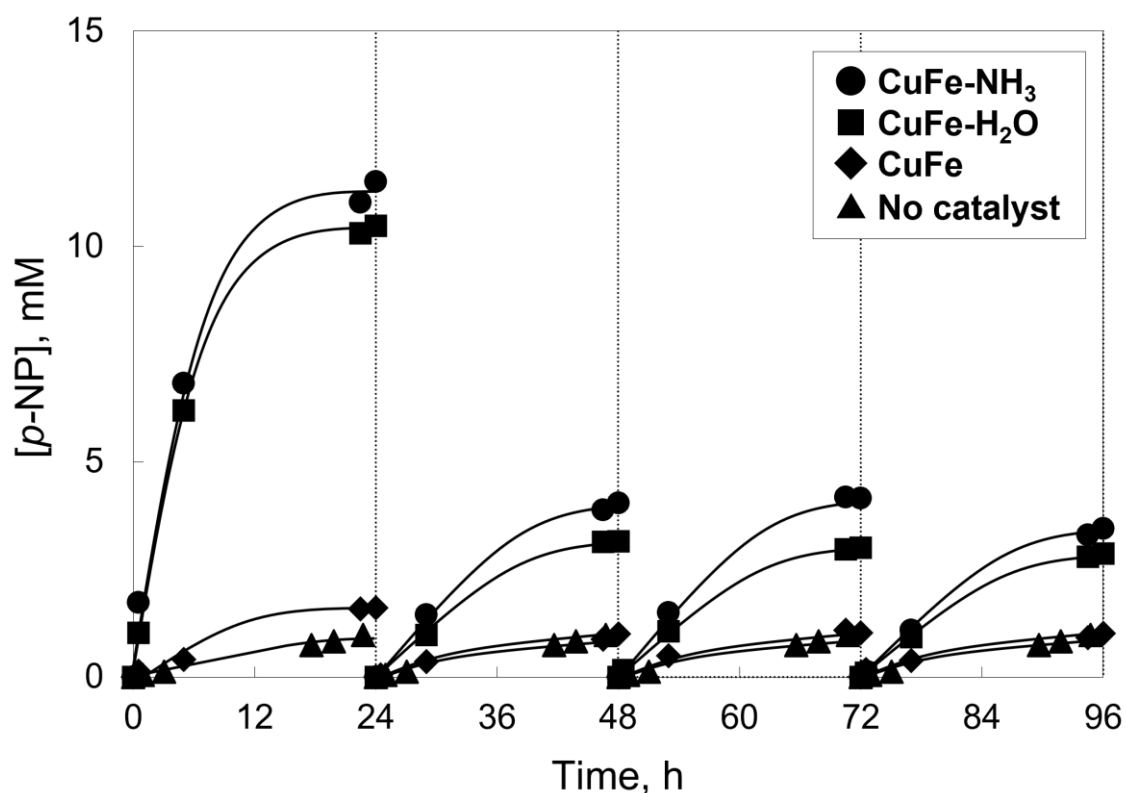

**Figure S7.** Time profiles of the *p*-nitrophenolate ion (*p*-NP) formation in a HEPES buffer solution (100 mM, 0.75 mL, pH 6.0) containing disodium *p*-nitrophenyl phosphate (*p*-NPP, 25 mM) in the absence and presence of  $[\text{Cu}^{\text{II}}(\text{H}_2\text{O})_{8/3}]_{3/2}[\text{Fe}^{\text{II}}(\text{CN})_5(\text{NH}_3)]$  (**CuFe-NH<sub>3</sub>**),  $[\text{Cu}^{\text{II}}(\text{H}_2\text{O})_{8/3}]_{3/2}\{[\text{Fe}^{\text{II}}(\text{CN})_5(\text{H}_2\text{O})]_{3/4}[\text{Fe}^{\text{II}}(\text{CN})_5(\text{NH}_3)]_{1/4}\}$  (**CuFe-H<sub>2</sub>O**) and  $[\text{Cu}^{\text{II}}(\text{H}_2\text{O})_3]_2[\text{Fe}^{\text{II}}(\text{CN})_6]$  (**CuFe**) (0.063 mmol of Fe) at 50 °C. Catalysts were centrifugally recovered from the reaction solution for a next run.



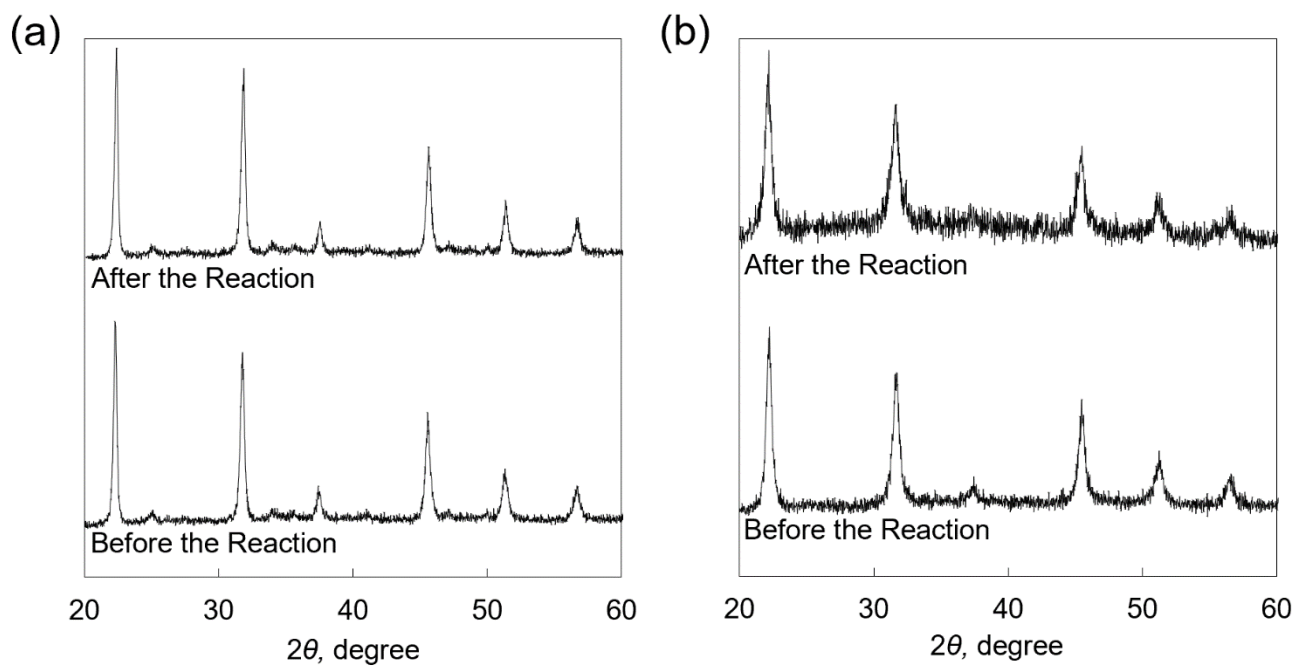

**Figure S8.** Powder X-ray diffraction patterns of (a)  $[\text{Cu}^{\text{II}}(\text{H}_2\text{O})_3]_2[\text{Fe}^{\text{II}}(\text{CN})_6]$  (**CuFe**) and (b)  $[\text{Cu}^{\text{II}}(\text{H}_2\text{O})_{8/3}]_{3/2}[\text{Fe}^{\text{II}}(\text{CN})_5(\text{NH}_3)]$  (**CuFe-NH<sub>3</sub>**) before and after catalytic hydrolysis of disodium *p*-nitrophenyl phosphate (*p*-NPP, 25 mM) in a HEPES buffer solution (100 mM, 0.75 mL, pH 6.0, 50 °C) for 24 h.

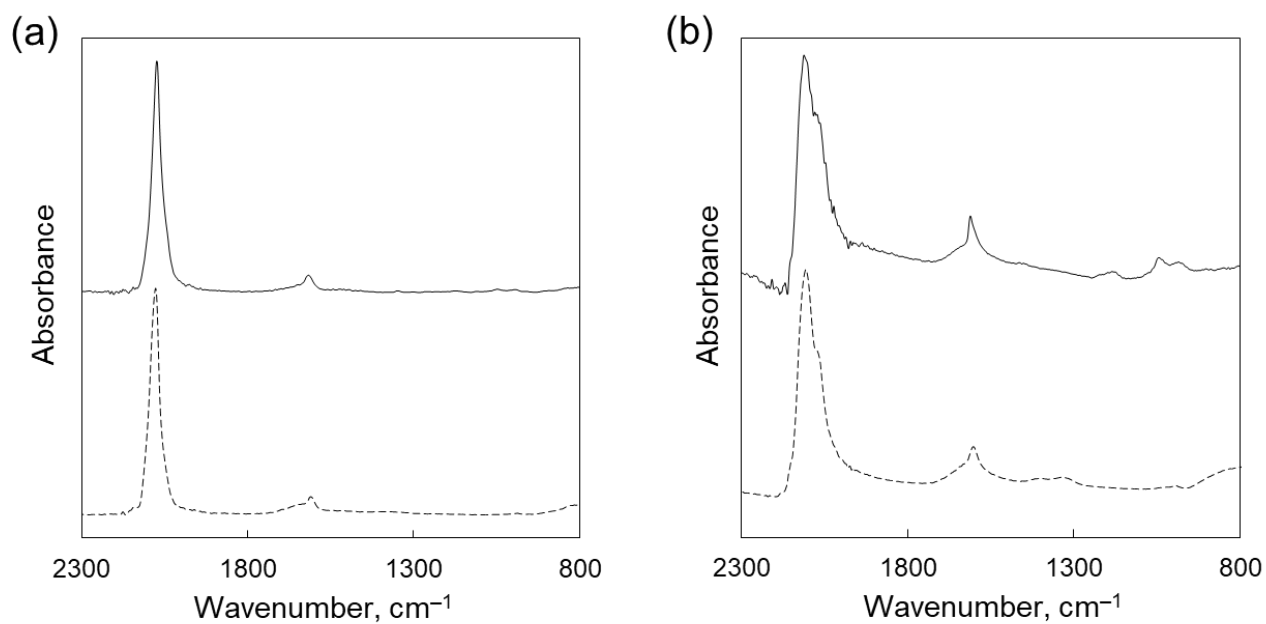

**Figure S9.** Infrared (IR) spectra of (a)  $[\text{Co}^{\text{II}}(\text{H}_2\text{O})_3]_2[\text{Fe}^{\text{II}}(\text{CN})_6]$  (**CoFe**) and (b)  $[\text{Ga}^{\text{III}}(\text{H}_2\text{O})_{3/2}]_{4/3}[\text{Fe}^{\text{II}}(\text{CN})_6]$  (**GaFe**) before (broken lines) and after (solid lines) catalytic hydrolysis of disodium *p*-nitrophenyl phosphate (*p*-NPP, 25 mM) in a HEPES buffer solution (100 mM, 0.75 mL, pH 6.0, 50 °C) for 24 h.

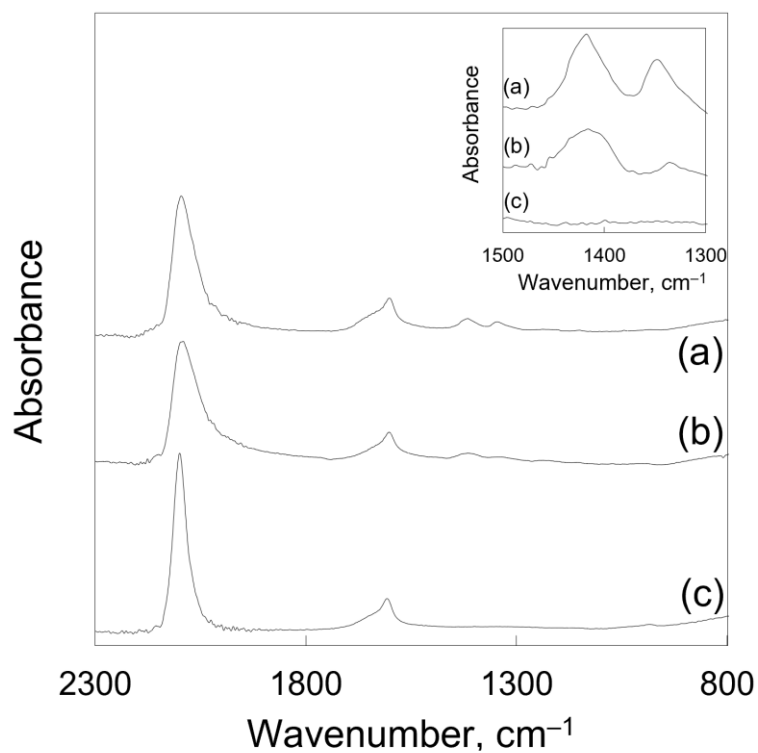

**Figure S10.** Infrared (IR) spectra of (a)  $[\text{Cu}^{\text{II}}(\text{H}_2\text{O})_{8/3}]_{3/2}[\text{Fe}^{\text{II}}(\text{CN})_5(\text{NH}_3)]$  (**CuFe-NH<sub>3</sub>**), (b)  $[\text{Cu}^{\text{II}}(\text{H}_2\text{O})_{8/3}]_{3/2}\{[\text{Fe}^{\text{II}}(\text{CN})_5(\text{H}_2\text{O})]_{3/4}[\text{Fe}^{\text{II}}(\text{CN})_5(\text{NH}_3)]_{1/4}\}$  (**CuFe-H<sub>2</sub>O**) and (c)  $[\text{Cu}^{\text{II}}(\text{H}_2\text{O})_3]_2[\text{Fe}^{\text{II}}(\text{CN})_6]$  (**CuFe**) obtained by the attenuated total reflection (ATR) technique. Magnified view of the  $\delta_{\text{HNH}}$  region ( $1300\text{--}1500\text{ cm}^{-1}$ ) is shown in the inset.

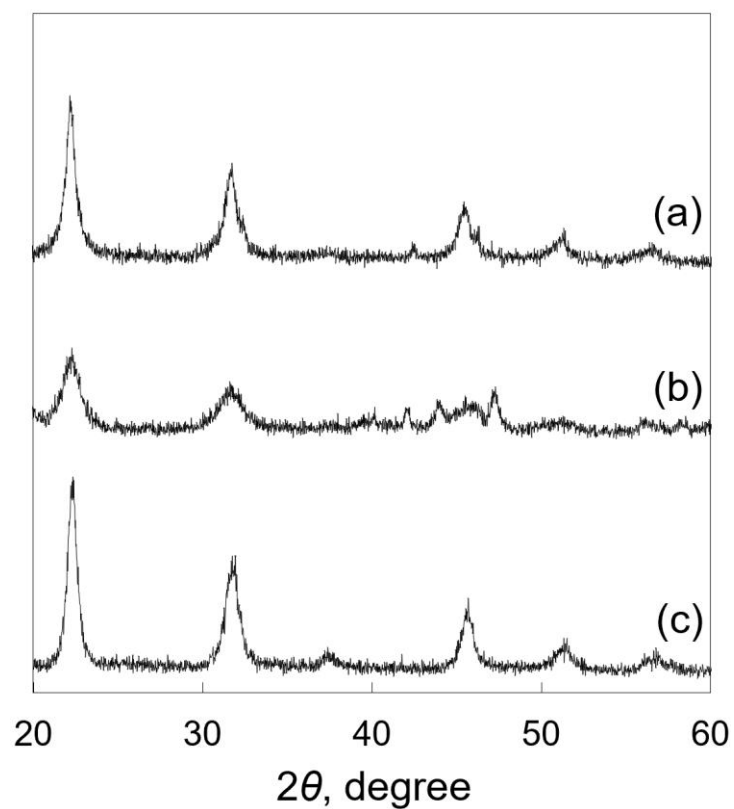

**Figure S11.** Powder X-ray diffraction (PXRD) patterns of (a)  $[\text{Cu}^{\text{II}}(\text{H}_2\text{O})_{8/3}]_{3/2}[\text{Fe}^{\text{II}}(\text{CN})_5(\text{NH}_3)]$  (**CuFe-NH<sub>3</sub>**), (b)  $[\text{Cu}^{\text{II}}(\text{H}_2\text{O})_{8/3}]_{3/2}\{[\text{Fe}^{\text{II}}(\text{CN})_5(\text{H}_2\text{O})]_{3/4}[\text{Fe}^{\text{II}}(\text{CN})_5(\text{NH}_3)]_{1/4}\}$  (**CuFe-H<sub>2</sub>O**) and (c)  $[\text{Cu}^{\text{II}}(\text{H}_2\text{O})_3]_2[\text{Fe}^{\text{II}}(\text{CN})_6]$  (**CuFe**).

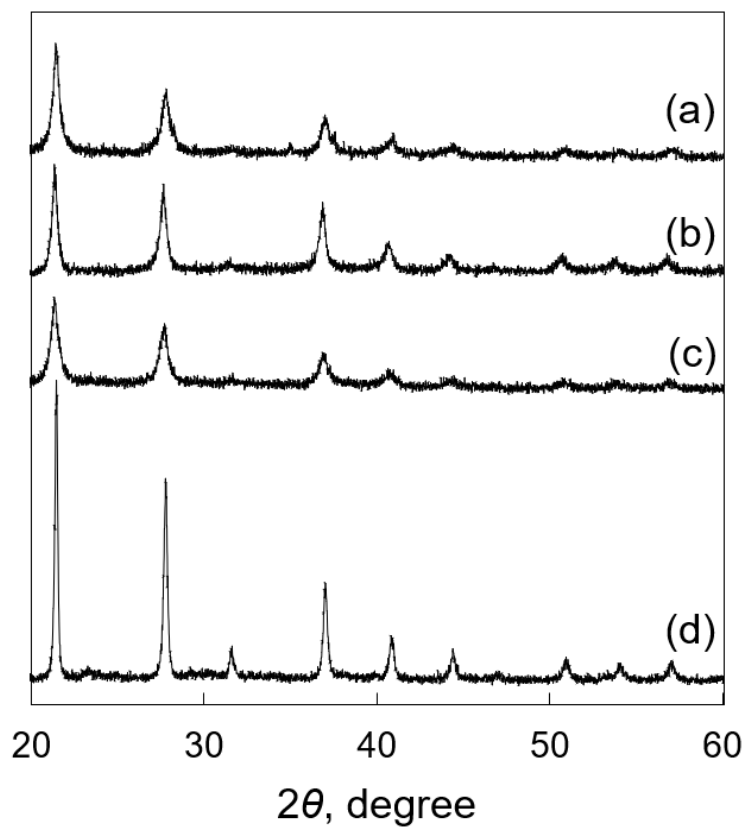

**Figure S12.** Powder X-ray diffraction (PXRD) patterns of  $[\text{Cu}^{\text{II}}(\text{H}_2\text{O})_x]_y\{[\text{Fe}^{\text{II}}(\text{CN})_5(\text{NH}_3)]_n[\text{Fe}^{\text{II}}(\text{CN})_6]_{1-n}\}$  complexes. [(a)  $n = 1$ , (b)  $n = 0.83$ , (c)  $n = 0.5$  and (d)  $n = 0$ ]

**Table S1.** Concentrations of iron (Fe) and sodium (Na), and their molar ratio (Na/Fe) in the digested solutions of  $[\text{Cu}^{\text{II}}(\text{H}_2\text{O})_3]_2[\text{Fe}^{\text{II}}(\text{CN})_6]$  (**CuFe**,  $190 \mu\text{g L}^{-1}$ ),  $[\text{Cu}^{\text{II}}(\text{H}_2\text{O})_{8/3}]_{3/2}[\text{Fe}^{\text{II}}(\text{CN})_5(\text{NH}_3)]$  (**CuFe-NH<sub>3</sub>**,  $36 \mu\text{g L}^{-1}$ ) and  $[\text{Cu}^{\text{II}}(\text{H}_2\text{O})_{8/3}]_{3/2}[\text{Fe}^{\text{II}}(\text{CN})_5(\text{H}_2\text{O})]$  (**CuFe-H<sub>2</sub>O**,  $71 \mu\text{g L}^{-1}$ ) determined by inductively coupled plasma optical emission spectroscopy (ICP-OES) analyses

| PBA                        | Fe concentration,<br>$\mu\text{g L}^{-1}$ | Na concentration,<br>$\mu\text{g L}^{-1}$ | Molar ratio (Na/Fe) |
|----------------------------|-------------------------------------------|-------------------------------------------|---------------------|
| <b>CuFe</b>                | 25.12                                     | 0.46                                      | 0.044               |
| <b>CuFe-NH<sub>3</sub></b> | 45.83                                     | 0.50                                      | 0.026               |
| <b>CuFe-H<sub>2</sub>O</b> | 56.88                                     | 0.50                                      | 0.021               |

**Table S2.** Concentrations of phosphorus (P) and their molar ratio of (P/Fe) in the digested solutions of  $[\text{Cu}^{\text{II}}(\text{H}_2\text{O})_{8/3}]_{3/2}[\text{Fe}^{\text{II}}(\text{CN})_5(\text{NH}_3)]$  (**CuFe-NH<sub>3</sub>**,  $41.16 \text{ mg mL}^{-1}$ ) and  $[\text{Cu}^{\text{II}}(\text{H}_2\text{O})_3]_2[\text{Fe}^{\text{II}}(\text{CN})_6]$  (**CuFe**,  $42.04 \text{ mg L}^{-1}$ ) determined by inductively coupled plasma mass spectrometry (ICP-MS) analyses

| PBA                        | Fe concentration,<br>$\mu\text{g L}^{-1}$ | P concentration,<br>$\mu\text{g L}^{-1}$ | Molar ratio (P/Fe) |
|----------------------------|-------------------------------------------|------------------------------------------|--------------------|
| <b>CuFe-NH<sub>3</sub></b> | 4.68                                      | 0.056                                    | 0.12               |
| <b>CuFe</b>                | 5.33                                      | 0.18                                     | 0.021              |
